# Supplementary material
Source: Royal Society of Chemistry journal article supplement (doi:10.1039/d5ta09879c)
Supplement: d5ta09879c1.pdf [file d5ta09879c1.pdf]

**Regulating hydrogen spillover in Pt/M-ZrO<sub>2</sub> catalysed reductive methylation of aniline  
under mild conditions**

Kanika Saini,<sup>[a]</sup> Supan,<sup>[a]</sup> Neeraj Sharma,<sup>[a]</sup> Srinivasarao Arulananda Babu<sup>[b]</sup> Hu Li<sup>[c]</sup> and  
Shunmugavel Saravanamurugan<sup>\*[a]</sup>

*<sup>a</sup>Laboratory of Bioproduct Chemistry, BRIC-National Agri-Food and Biomanufacturing  
Institute (Formerly Center of Innovative and Applied Bioprocessing), Sector-81 (Knowledge  
City), Mohali – 140 306, Punjab, India. Email: saravana@ciab.res.in*

*<sup>b</sup>Department of Chemical Sciences, Indian Institute of Science Education and Research  
(IISER) Mohali, Manauli P.O., Sector 81, SAS Nagar, Mohali, Knowledge City, Punjab,  
140306, India.*

*<sup>c</sup>State Key Laboratory of Green Pesticides, State-Local Joint Laboratory for Comprehensive  
Utilization of Biomass, Center for R&D of Fine Chemicals, Guizhou University, Guiyang,  
Guizhou 550025, China.*

**Table S1.** Catalytic results of N-methylation of aniline using Pt/M-ZrO<sub>2</sub> with different methylating agents.

| S. No.         | C <sub>1</sub> source   | Aniline Conv. (%) | NNDMA Yield (%) |
|----------------|-------------------------|-------------------|-----------------|
| 1 <sup>a</sup> | Formalin (formaldehyde) | 99.7              | 68.4            |
| 2 <sup>b</sup> | Paraformaldehyde        | 25.4              | 1.2             |
| 3 <sup>c</sup> | Methanol                | 19.3              | --              |
| 4 <sup>d</sup> | CO <sub>2</sub>         | 18.1              | --              |

Reaction conditions: 0.5 mmol aniline, 25 mg Pt/M-ZrO<sub>2</sub> (0.003 mmol Pt), 15 g MeOH, 50 °C, 20 bar H<sub>2</sub>, 0.5h. <sup>a</sup>150 mg formalin. <sup>b</sup>70 mg paraformaldehyde. <sup>c</sup> methanol solvent used as an alkylating agent. <sup>d</sup>10 bar CO<sub>2</sub>.

**Table S2.** Comparison of the catalytic efficiency of the present study with the existing studies.

| Entry | Catalyst              | Conditions                                   | Yield  | TOF (h <sup>-1</sup> ) | Ref.             |
|-------|-----------------------|----------------------------------------------|--------|------------------------|------------------|
| 1     | Ru/C                  | 70 °C, 8h, 25 bar H <sub>2</sub>             | >99    | 13                     | 1                |
| 2     | Pt/C                  | 70 °C, 8h, 25 bar H <sub>2</sub>             | 95     | 17                     | 1                |
| 3     | Pd/C                  | 70 °C, 8h, 25 bar H <sub>2</sub>             | 99     | 32                     | 1                |
| 4     | Rh/C                  | 70 °C, 8h, 25 bar H <sub>2</sub>             | 76     | 13                     | 1                |
| 5     | Raney Ni              | 70 °C, 8h, 25 bar H <sub>2</sub>             | 99     | -                      | 1                |
| 6     | Raney Co              | 70 °C, 8h, 25 bar H <sub>2</sub>             | 99     | -                      | 1                |
| 7     | Raney Ni (6)          | 180 °C, 7h, 17 bar H <sub>2</sub>            | 65     | 31.0                   | 2                |
| 8     | CuAlOx                | 120 °C, 5h, 10 bar H <sub>2</sub>            | 95 (N) | 1.2                    | 3                |
| 9     | Ni/NiO@C              | 80 °C, 6h, 20 bar H <sub>2</sub>             | 99     | 0.6                    | 4                |
| 10    | Pt/M-ZrO <sub>2</sub> | 0.5 mmol, 50 °C, 0.5h, 20 bar H <sub>2</sub> | 68.4   | 622                    | <b>This work</b> |
| 11    | Pt/M-ZrO <sub>2</sub> | 4 mmol, 50 °C, 2h, 20 bar H <sub>2</sub>     | 81.6   | 1484                   | <b>This work</b> |

**Table S3:** Physicochemical properties of parent and Pt supported on ZrO<sub>2</sub>.

| S. No. | Catalyst              | Surface Area (m <sup>2</sup> /g) | BJH Pore Size (D=nm) | Total Pore Volume (cc/g) |
|--------|-----------------------|----------------------------------|----------------------|--------------------------|
| 1      | M-ZrO <sub>2</sub>    | 106.8                            | 31.0                 | 0.60                     |
| 2      | Pt/M-ZrO <sub>2</sub> | 116.3                            | 17.3                 | 0.58                     |
| 3      | T-ZrO <sub>2</sub>    | 6.9                              | 0.1                  | 0.01                     |
| 4      | Pt/T-ZrO <sub>2</sub> | 7.3                              | 1.7                  | 0.15                     |

**Table S4:** Metal dispersion and particle size of Pt supported on ZrO<sub>2</sub>.

| S. No. | Catalyst              | Dispersion (%) | Particle size (nm) |
|--------|-----------------------|----------------|--------------------|
|        |                       | CO-pulse       | HAADF-STEM/HRTEM   |
| 1      | Pt/M-ZrO <sub>2</sub> | 27.7           | 0.72               |
| 2      | Pt/T-ZrO <sub>2</sub> | 4.8            | 27.5               |

**Table S5:** Surface composition of elements of parent and Pt supported on ZrO<sub>2</sub> based on XPS analysis.

| S. No. | Catalyst              | Zr 3d; B.E (eV)   |                   | O 1s; B.E (eV)  |                 | Pt 4f; B.E (eV)                   |                                    |                                   |                                    |
|--------|-----------------------|-------------------|-------------------|-----------------|-----------------|-----------------------------------|------------------------------------|-----------------------------------|------------------------------------|
|        |                       | 3d <sub>5/2</sub> | 3d <sub>3/2</sub> | O <sub>L</sub>  | O <sub>A</sub>  | Pt <sup>0</sup> 4f <sub>5/2</sub> | Pt <sup>n+</sup> 4f <sub>5/2</sub> | Pt <sup>0</sup> 4f <sub>3/2</sub> | Pt <sup>n+</sup> 4f <sub>3/2</sub> |
| 1      | M-ZrO <sub>2</sub>    | 181.5             | 183.9             | 529.5<br>(66.3) | 531.1<br>(33.7) | -                                 | -                                  | -                                 | -                                  |
| 2      | T-ZrO <sub>2</sub>    | 181.9             | 184.3             | 529.7<br>(77.4) | 531.4<br>(22.6) | -                                 | -                                  | -                                 | -                                  |
| 3      | Pt/M-ZrO <sub>2</sub> | 181.6             | 184.0             | 529.5<br>(62.1) | 531.1<br>(37.9) | 71.5<br>(64.5)                    | 73.1                               | 75.0                              | 76.5                               |
| 4      | Pt/T-ZrO <sub>2</sub> | 181.8             | 184.2             | 529.6<br>(73.7) | 531.3<br>(26.3) | 70.6<br>(68.4)                    | 71.9                               | 73.9                              | 75.3                               |
| 5*     | Pt/M-ZrO <sub>2</sub> | 181.6             | 184.0             | 529.4<br>(66.1) | 531.0<br>(33.9) | 71.3<br>(62.2)                    | 72.8                               | 74.9                              | 76.6                               |

\*Spent catalyst, Values in the parenthesis are the percentage of corresponding species.

**Table S6:** Catalytic activity of Pt/M-ZrO<sub>2</sub> towards the synthesis of NNDMA from nitrobenzene via a one-pot two-step process.

| Entry                   | substrate    | product | Time (h) | conversion | Yield |
|-------------------------|--------------|---------|----------|------------|-------|
| 1. Step 1               | Nitrobenzene | Aniline | 1.5      | >99        | 94.8  |
| 2. Step 2*              | Aniline      | NNDMA   | 1.25     | >99        | 89.6  |
| 3. One-pot              | Nitrobenzene | NNDMA   | 4        | 95.6       | 56.0  |
| 4. One-pot <sup>#</sup> | Nitrobenzene | NNDMA   | 4        | >99        | 89.7  |

Reaction conditions: 0.5 mmol Nitrobenzene, 25 mg Pt/M-ZrO<sub>2</sub> (0.003 mmol Pt), 50 °C, 20 bar H<sub>2</sub>. \*reaction mixture from entry 1 was directly used for entry 2, <sup>#</sup>100 °C.

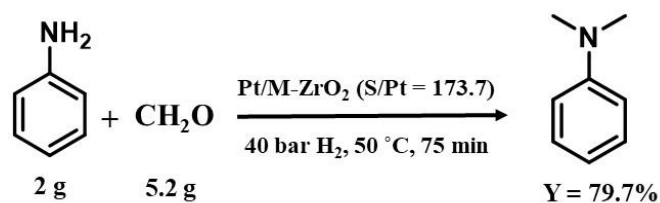

**Scheme S1:** Scale up experiment of the N, N-dimethylation of aniline using Pt/M-ZrO<sub>2</sub>.

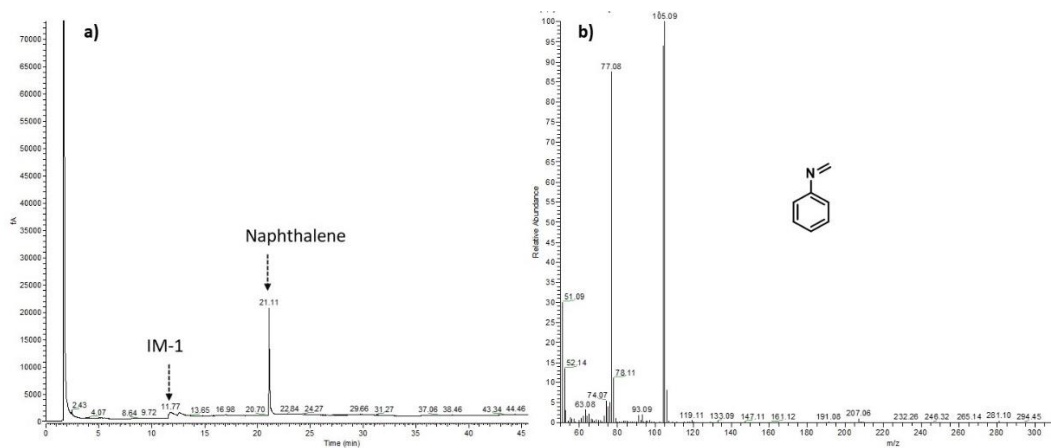

**Figure S1:** a) GC chromatogram of blank reaction without a catalyst (Table 1, entry 1) and b) GC-MS fragmentation of imine intermediate (IM-1).

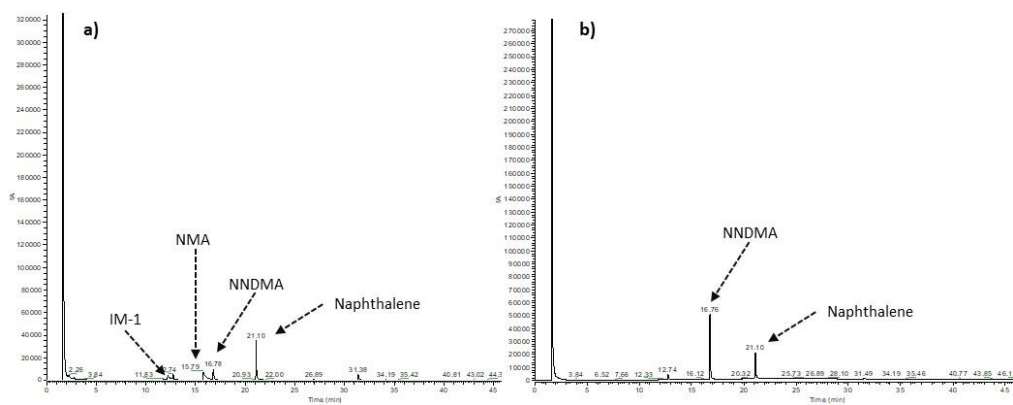

**Figure S2:** GC chromatograms of the reaction mixture with Pt/M-ZrO<sub>2</sub> as a catalyst after a) 0.5h and b) 1.25h.

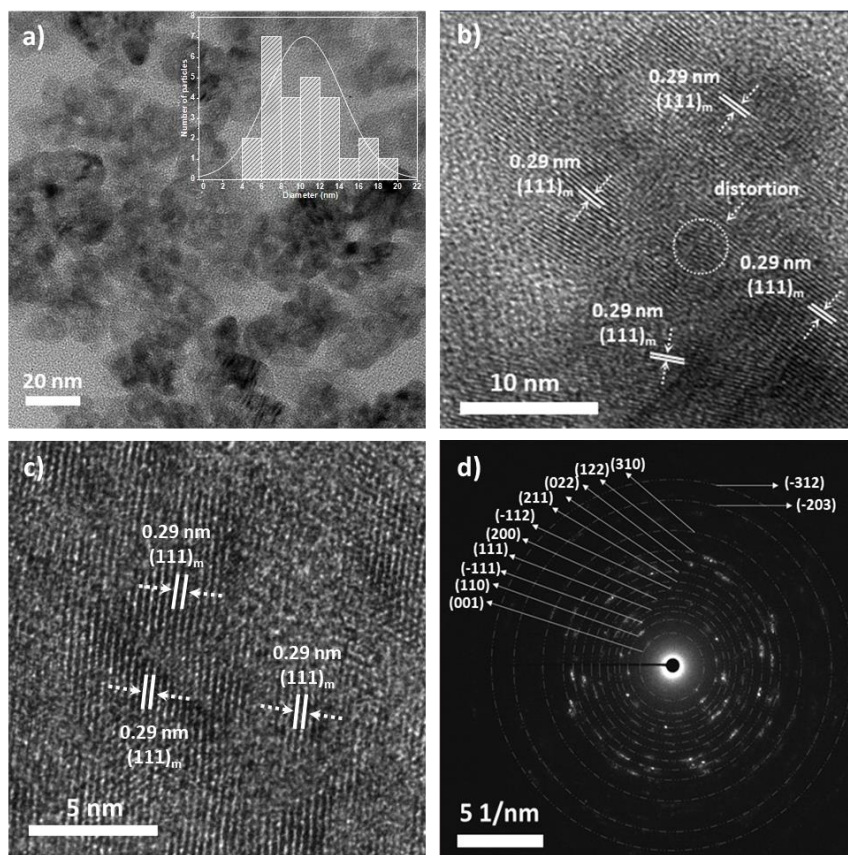

**Figure S3:** a-c) HRTEM images and d) SAED pattern of M-ZrO<sub>2</sub>.

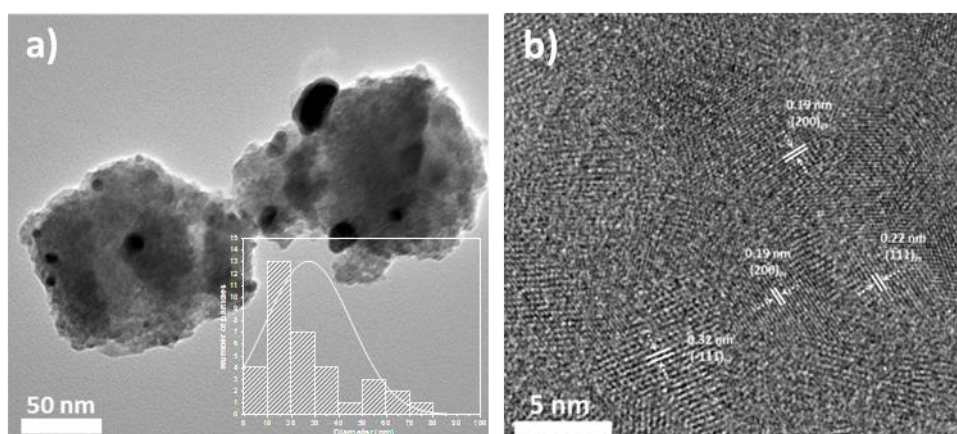

**Figure S4:** HRTEM images of Pt/T-ZrO<sub>2</sub>.

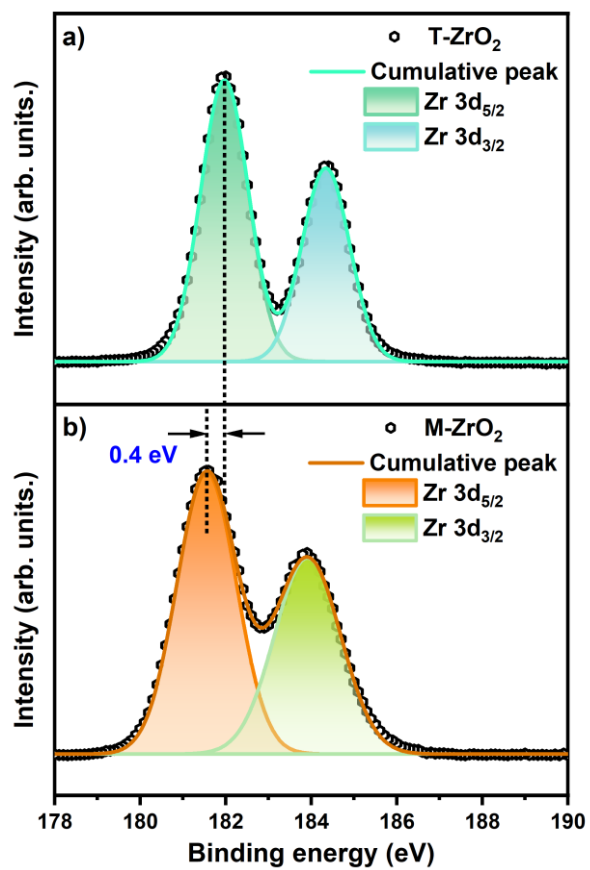

Figure S5: Zr 3d XPS spectra of a) T-ZrO<sub>2</sub>; b) M-ZrO<sub>2</sub>.

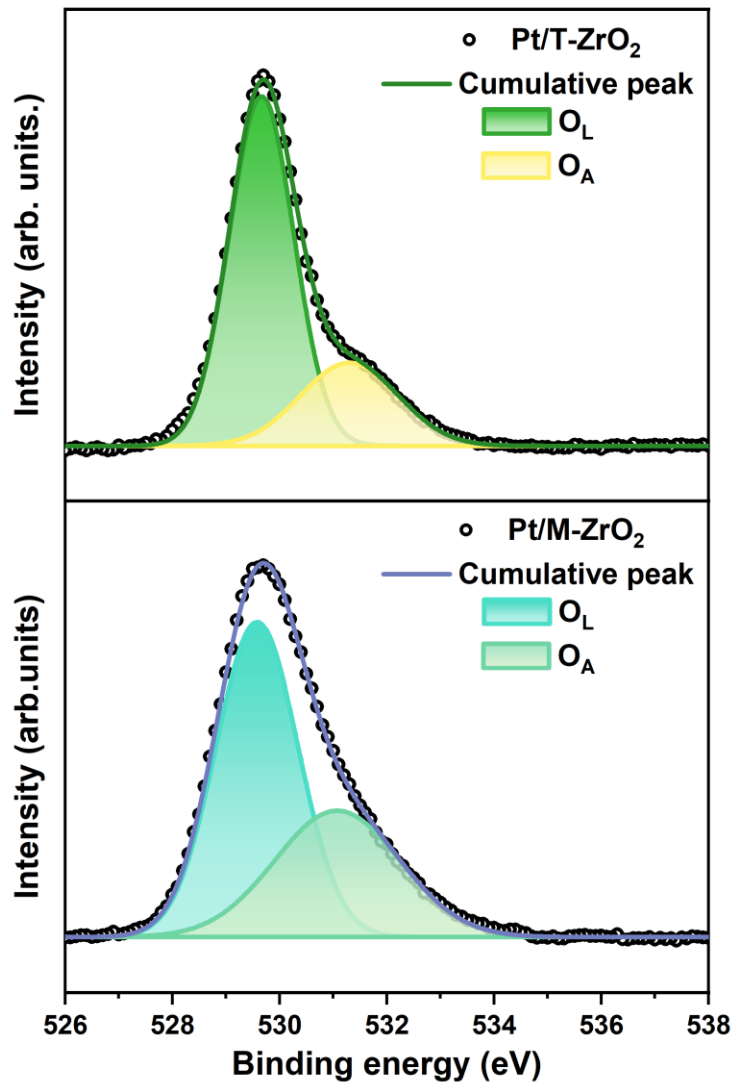

Figure S6: O 1s XPS spectra of a) T-ZrO<sub>2</sub>; b) M-ZrO<sub>2</sub>.

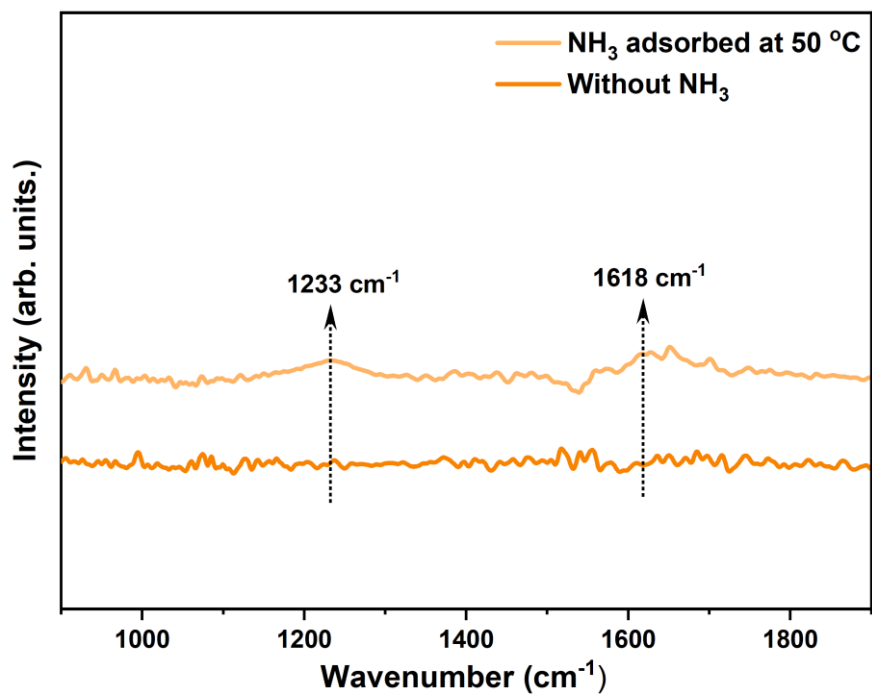

Figure S7: NH<sub>3</sub>-DRIFT spectra of Pt/T-ZrO<sub>2</sub>.

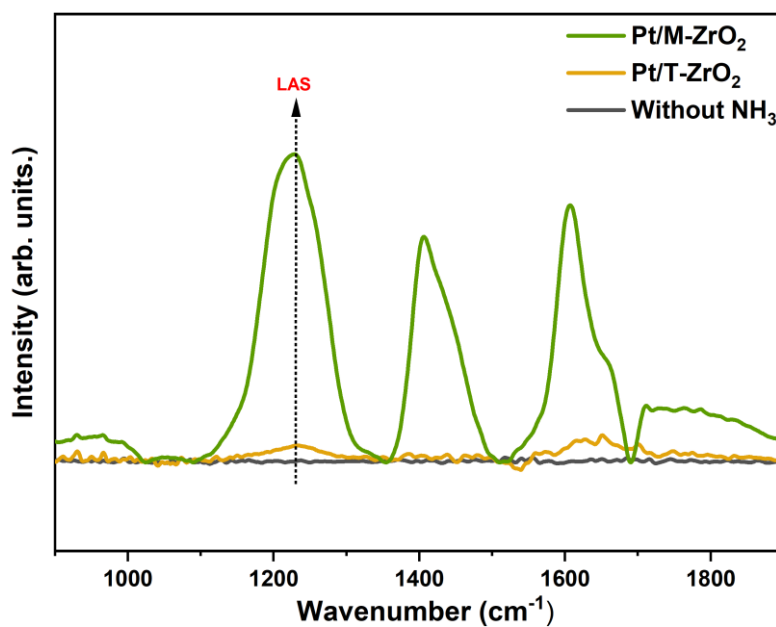

Figure S8: NH<sub>3</sub>-DRIFT spectra of Pt supported on ZrO<sub>2</sub> catalyst at 50 °C.

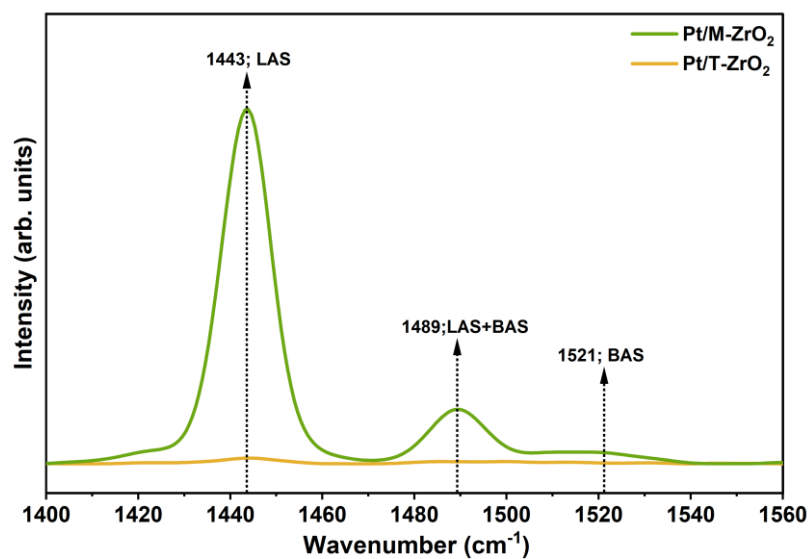

Figure S9. Pyridine DRIFT spectra of Pt/M-ZrO<sub>2</sub> and Pt/T-ZrO<sub>2</sub>.

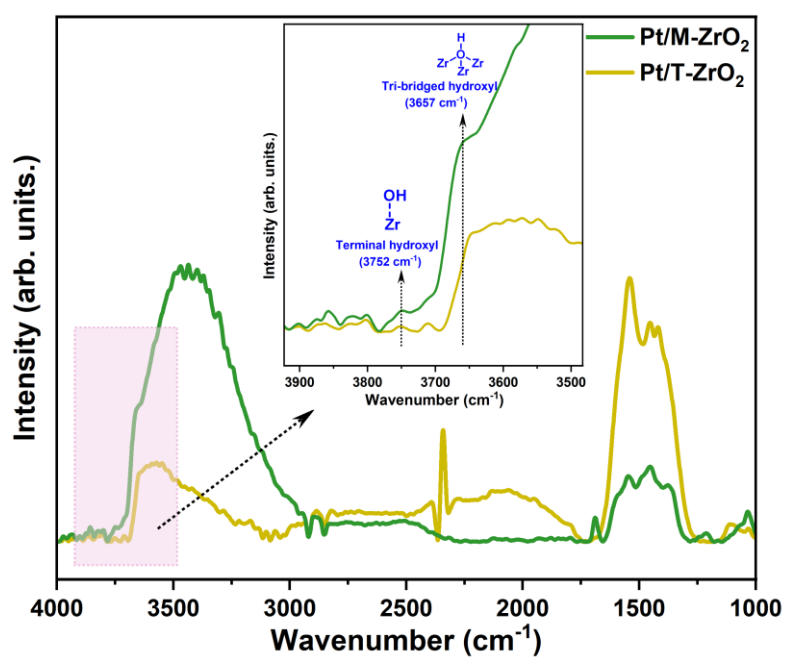

Figure S10: DRIFT spectra of Pt supported on ZrO<sub>2</sub> catalyst.

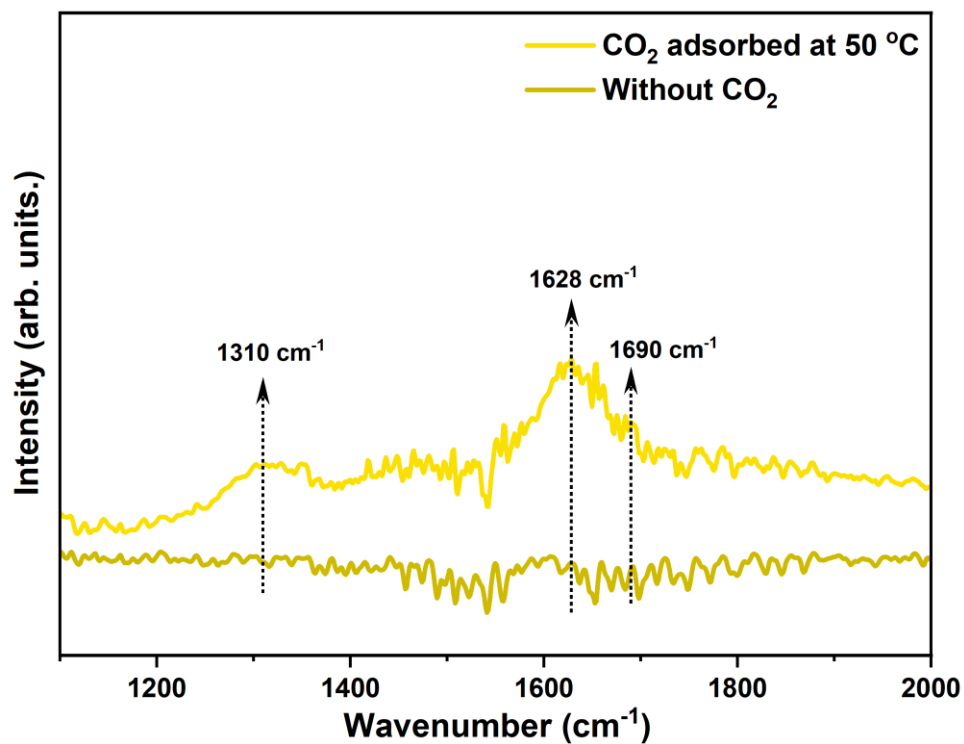

Figure S11:  $\text{CO}_2$ -DRIFT spectra of Pt/T- $\text{ZrO}_2$ .

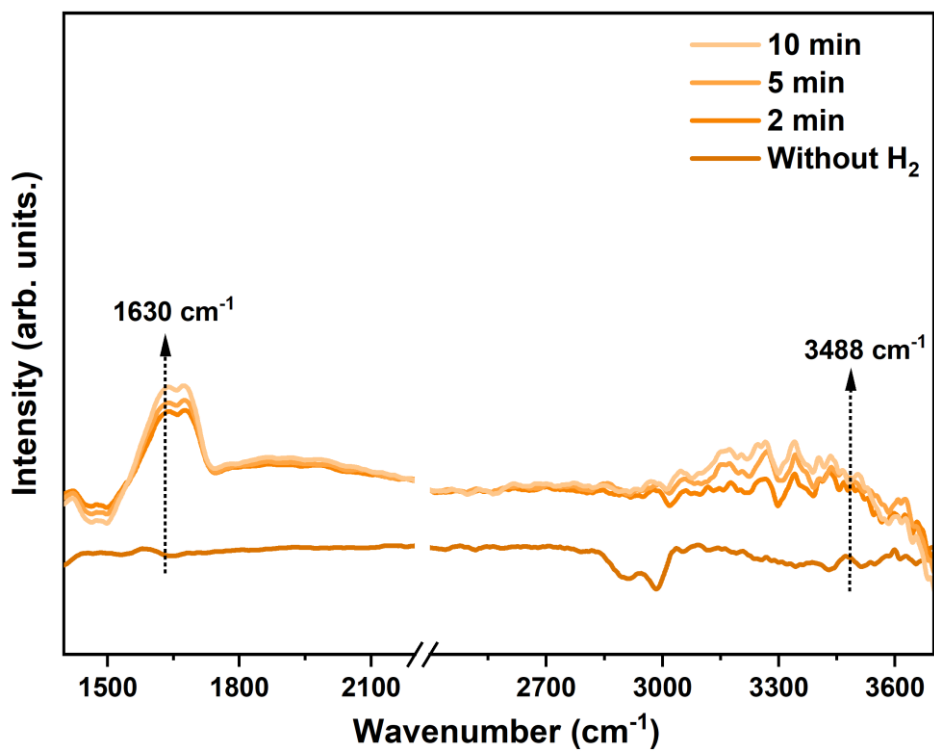

Figure S12:  $\text{H}_2$ -DRIFT spectra of M- $\text{ZrO}_2$ .

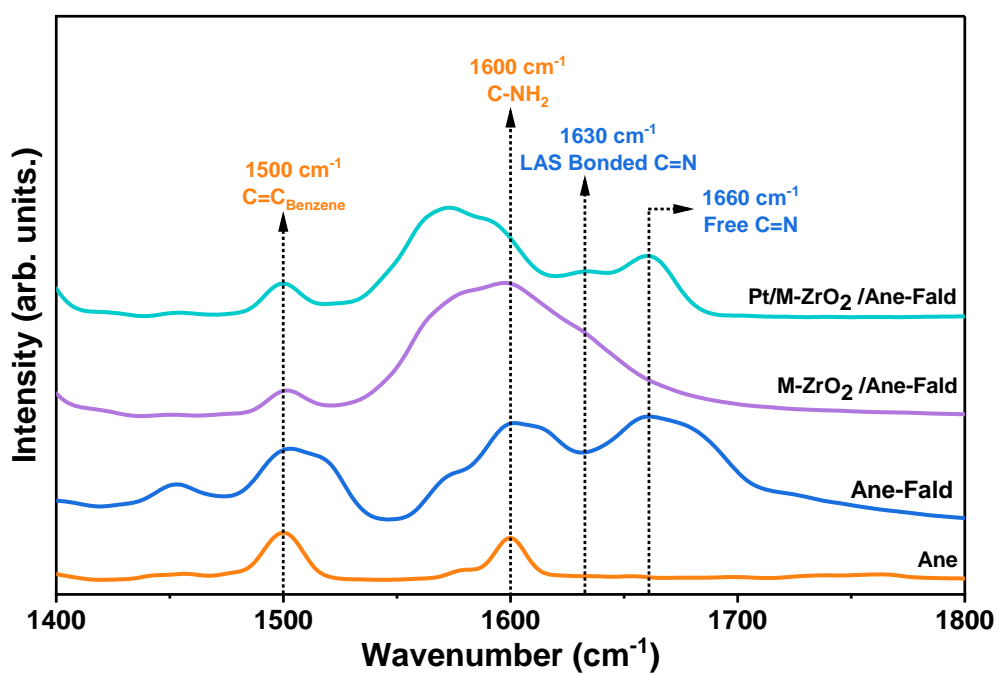

**Figure S13:** In-situ DRIFT spectra of aniline-formaldehyde mixture adsorbed over M-ZrO<sub>2</sub> and Pt/M-ZrO<sub>2</sub>. Ane: aniline; Fald: formaldehyde; Ane-Fald: aniline-formaldehyde mixture.

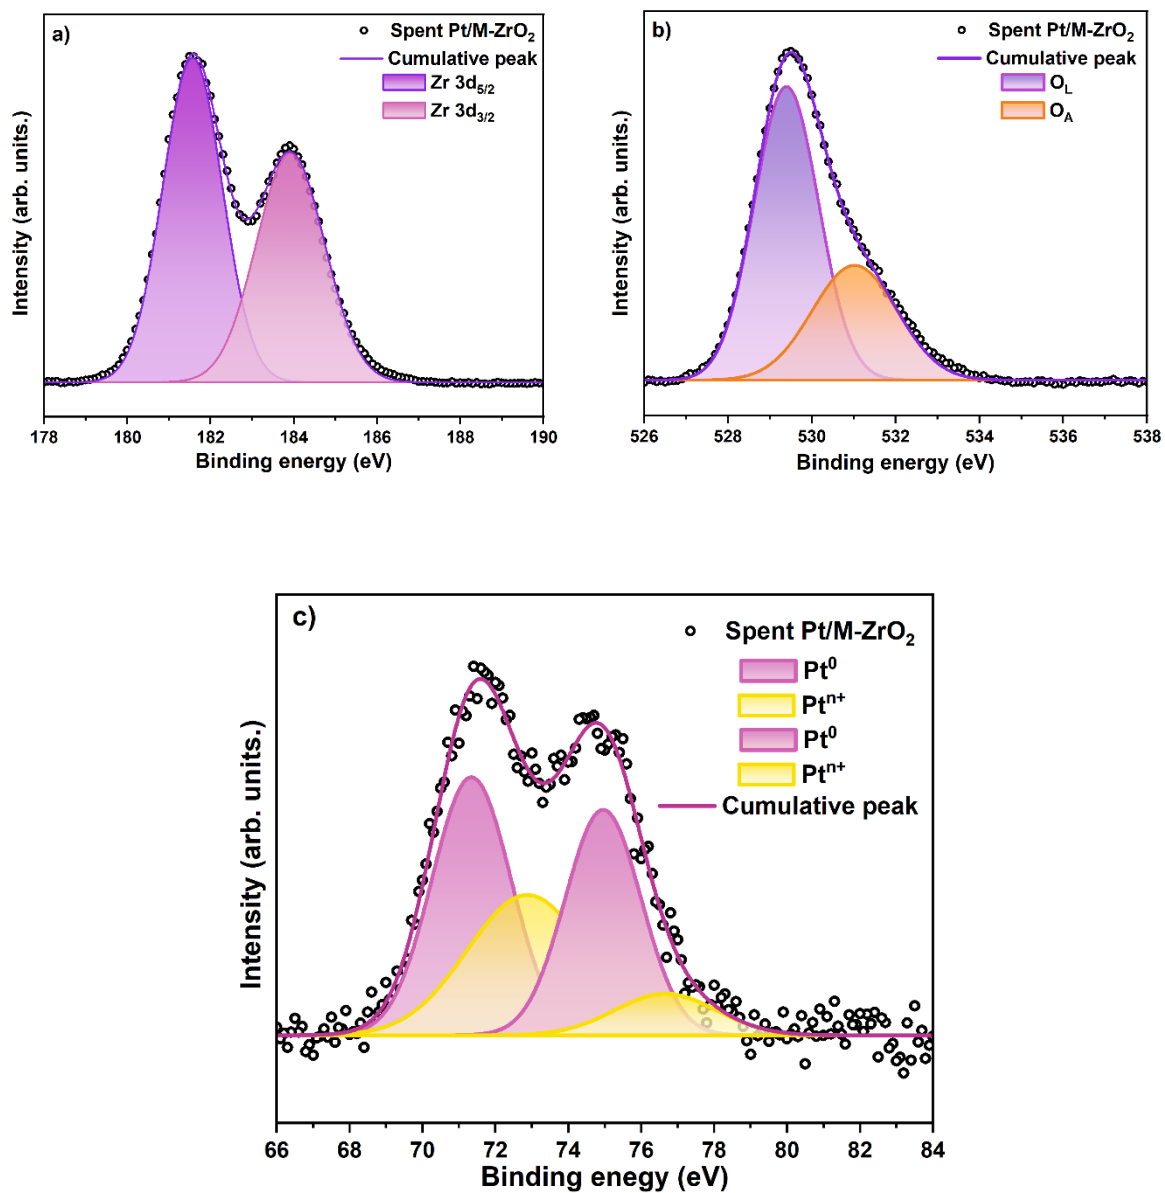

**Figure S14:** XPS spectra of a) Zr 3d, b) O 1s, c) Pt 4f of spent Pt/M-ZrO<sub>2</sub> (After 4<sup>th</sup> run).

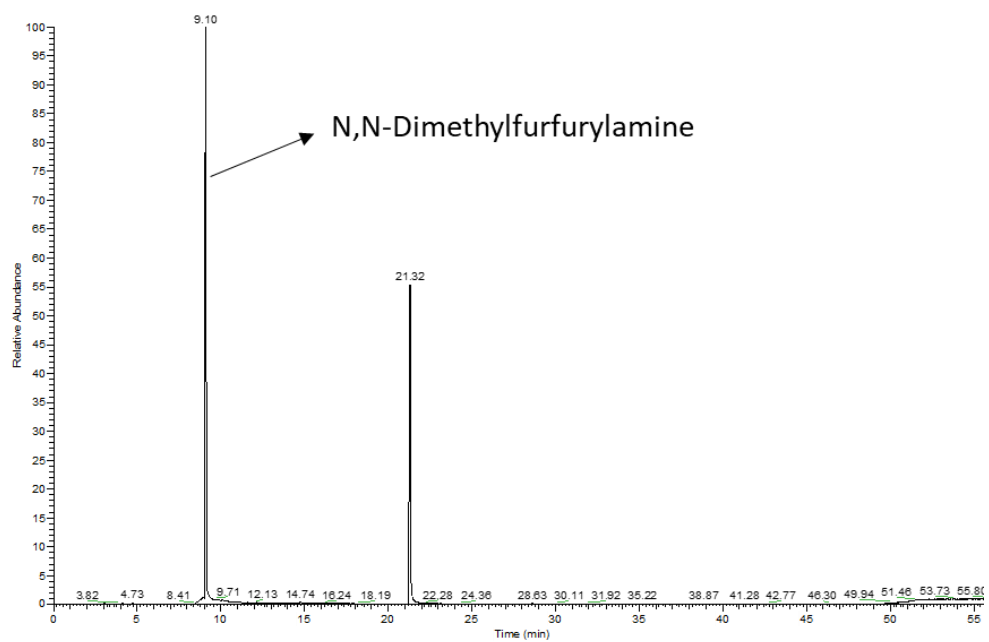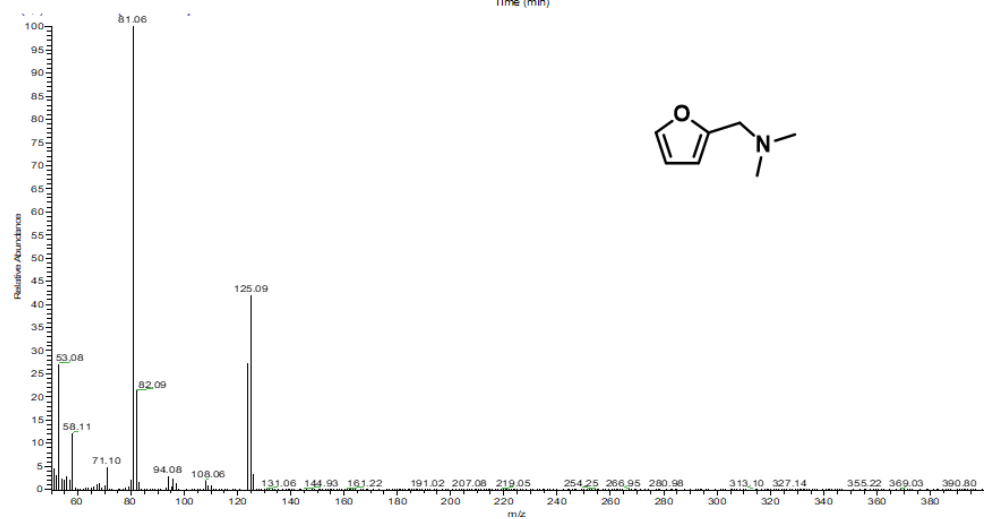

**Figure S15:** GC chromatograms of N-methylation of furfurylamine.

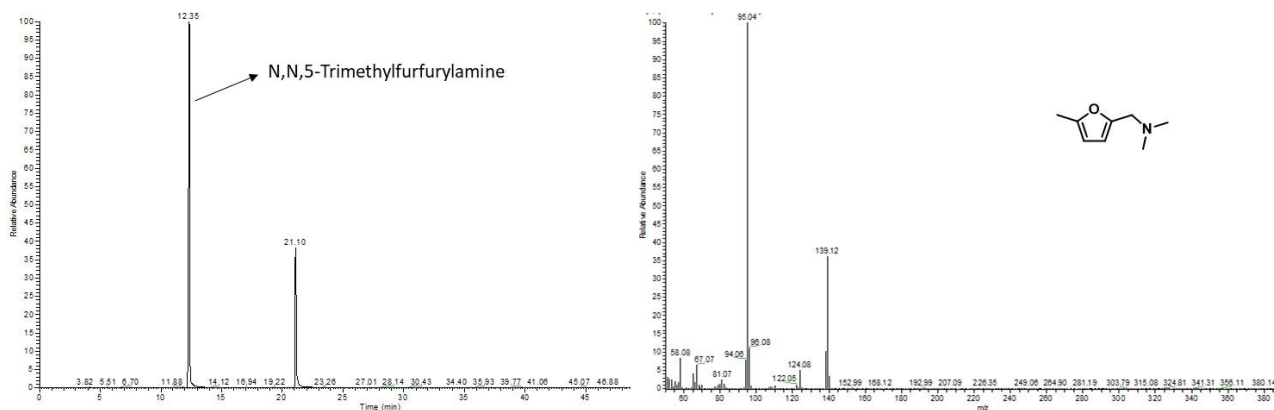

**Figure S16:** GC chromatograms of N-methylation of 5-methylfurfurylamine.

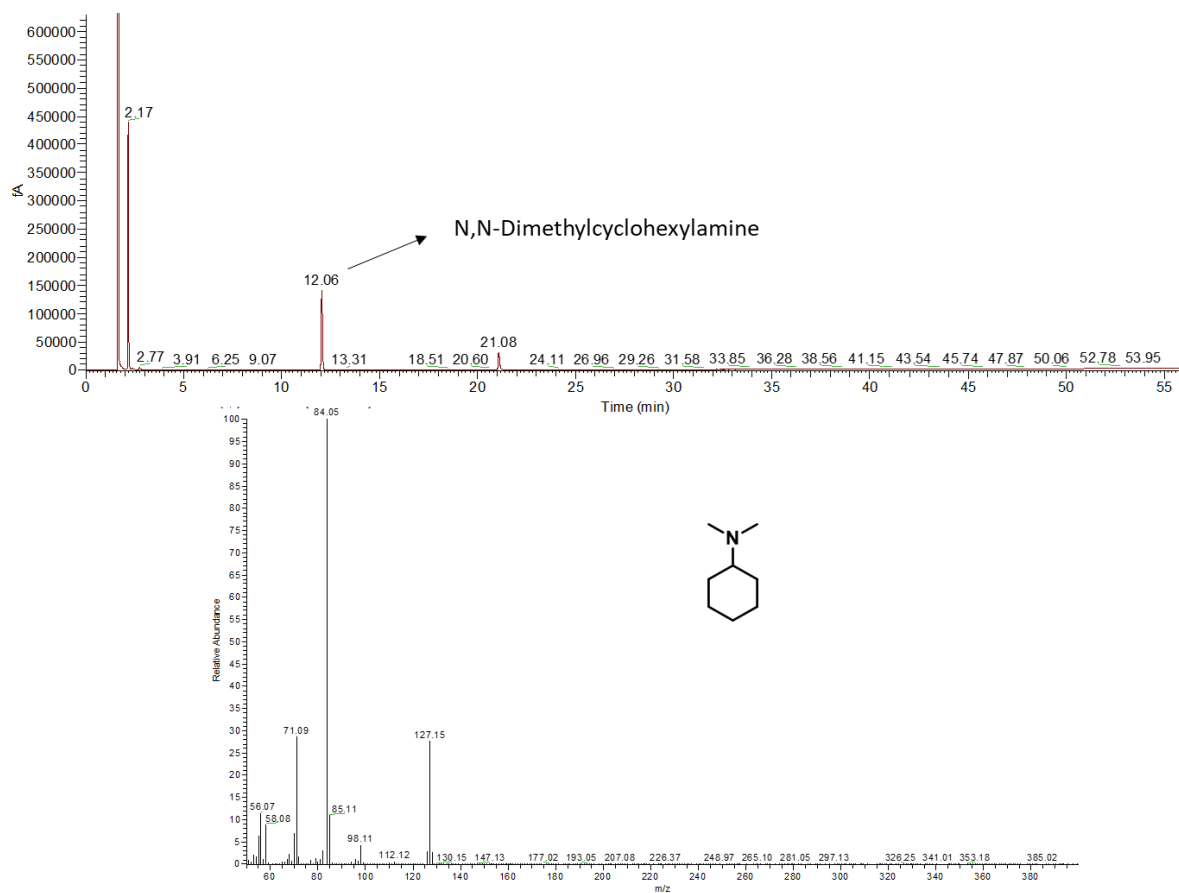

**Figure S17:** GC chromatograms of N-methylation of cyclohexylamine.

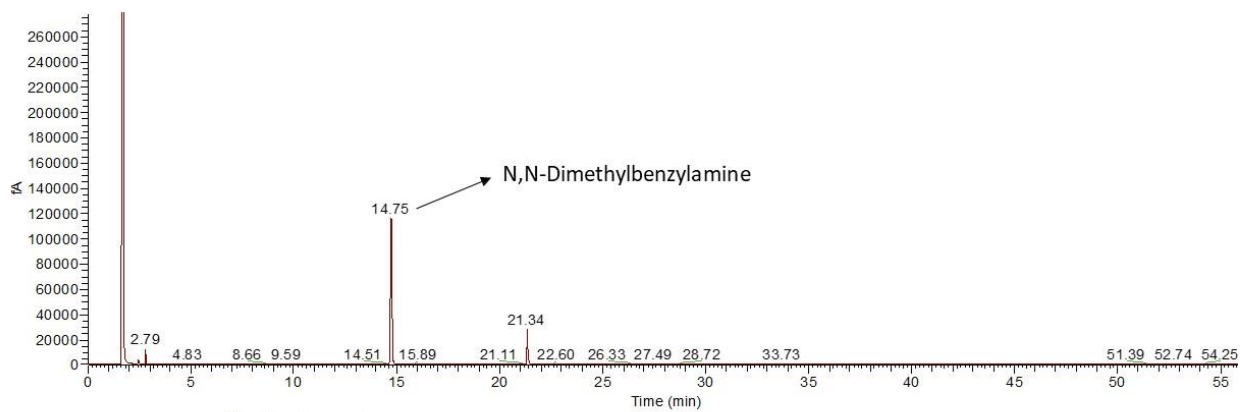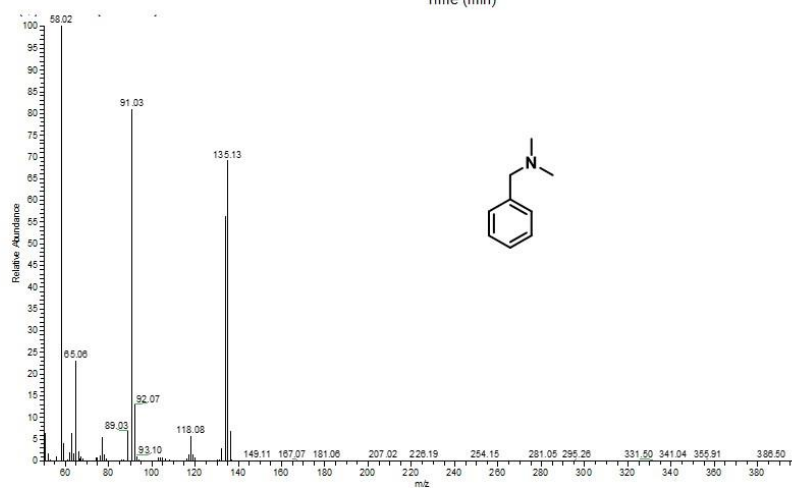

**Figure S18:** GC chromatograms of N-methylation of benzylamine.

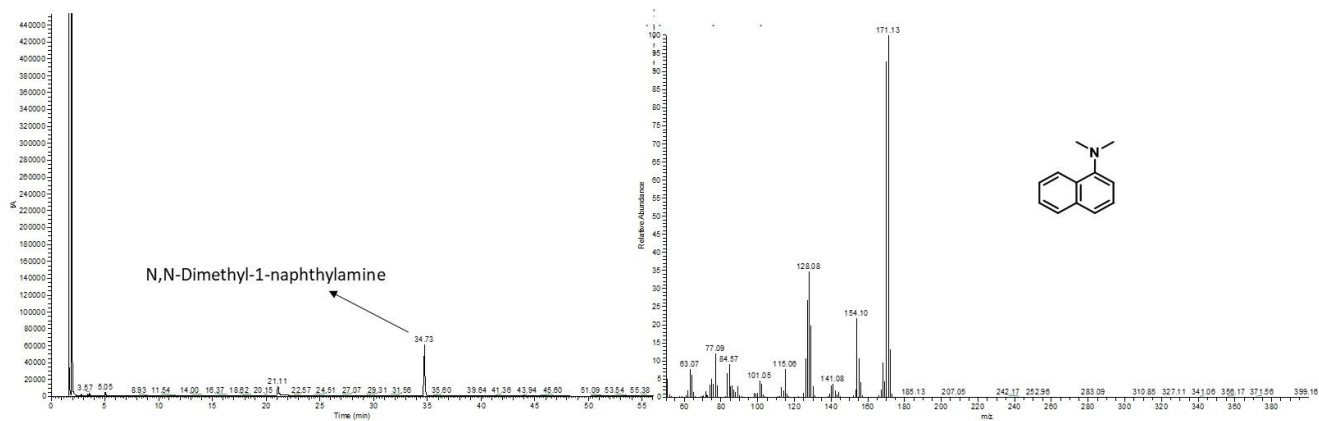

**Figure S19:** GC chromatograms of N-methylation of naphthylamine.

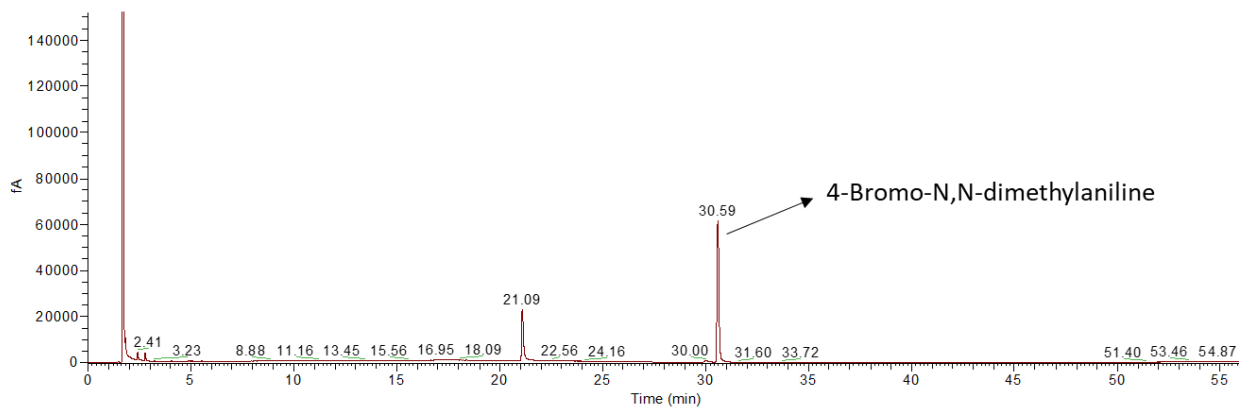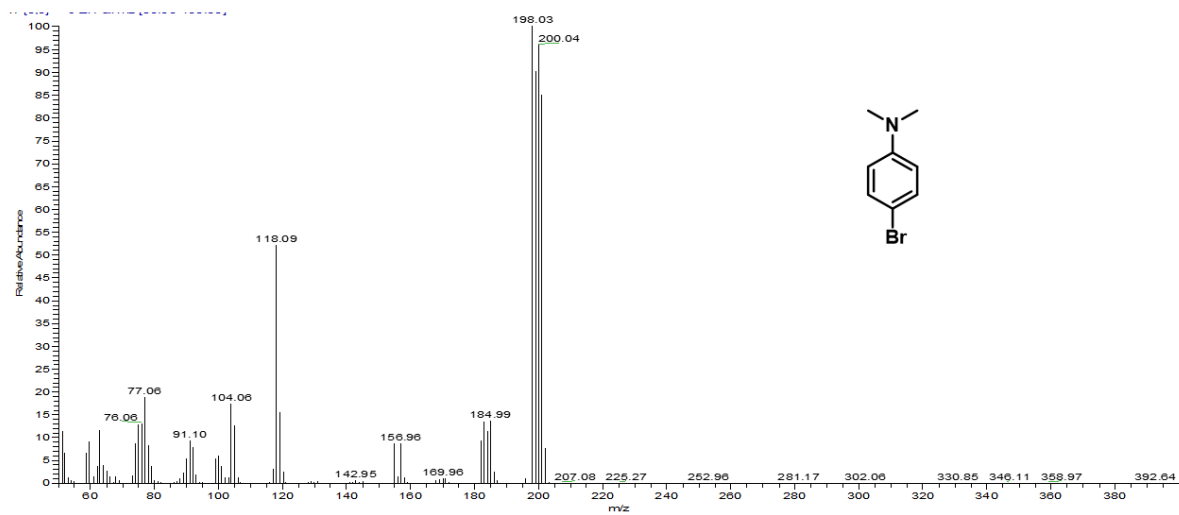

**Figure S20:** GC chromatograms of N-methylation of 4-bromoaniline.

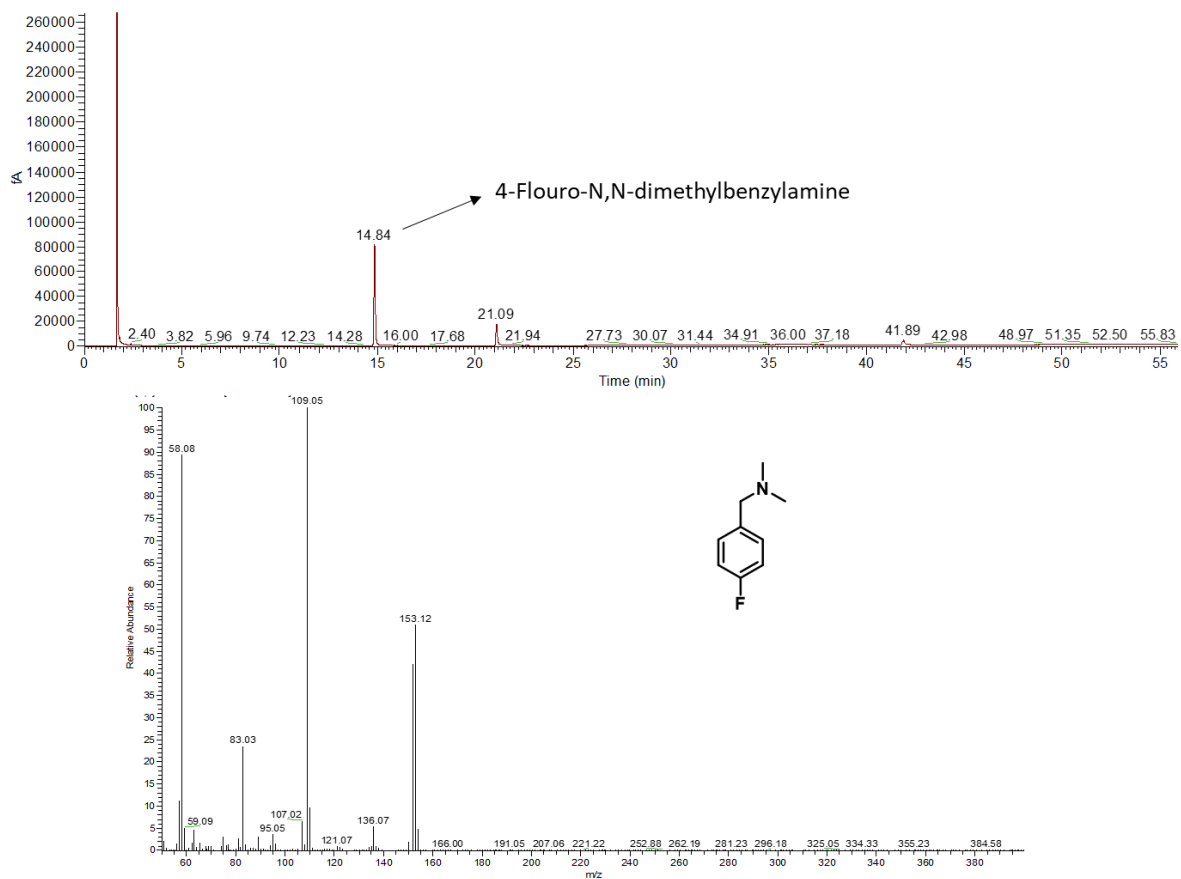

**Figure S21:** GC chromatograms of N-methylation of 4-flouro-benzylamine.

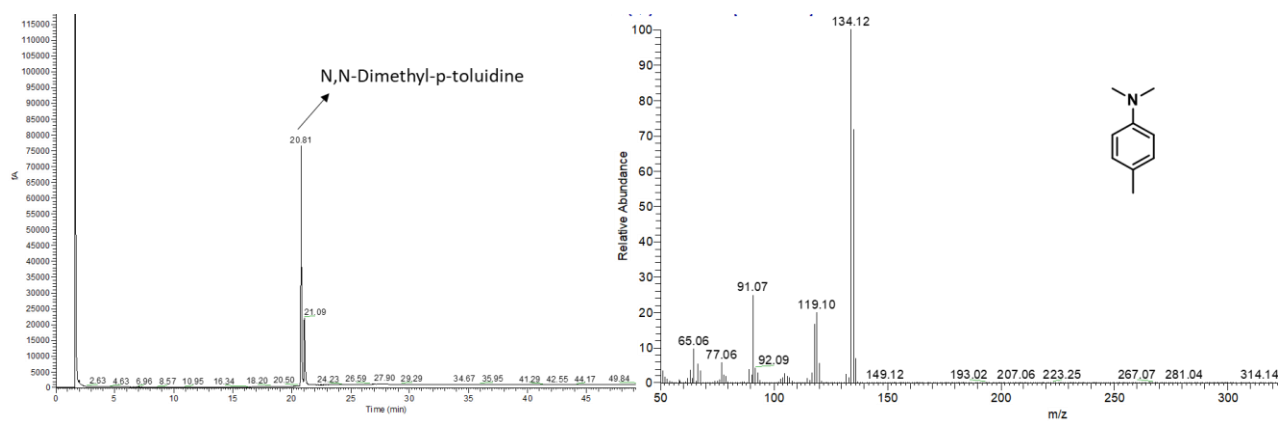

**Figure S22:** GC chromatograms of N-methylation of p-toluidine.

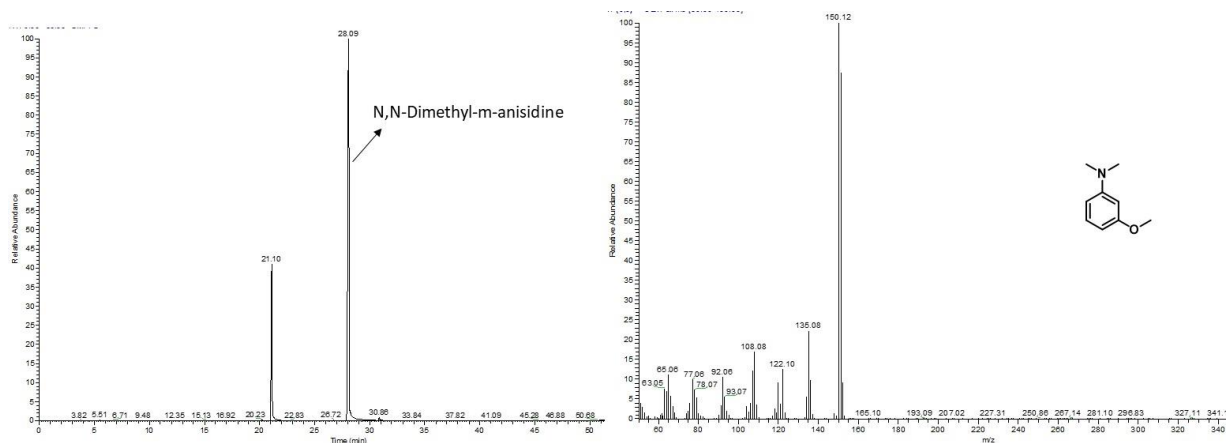

**Figure S23:** GC chromatograms of N-methylation of m-anisidine.

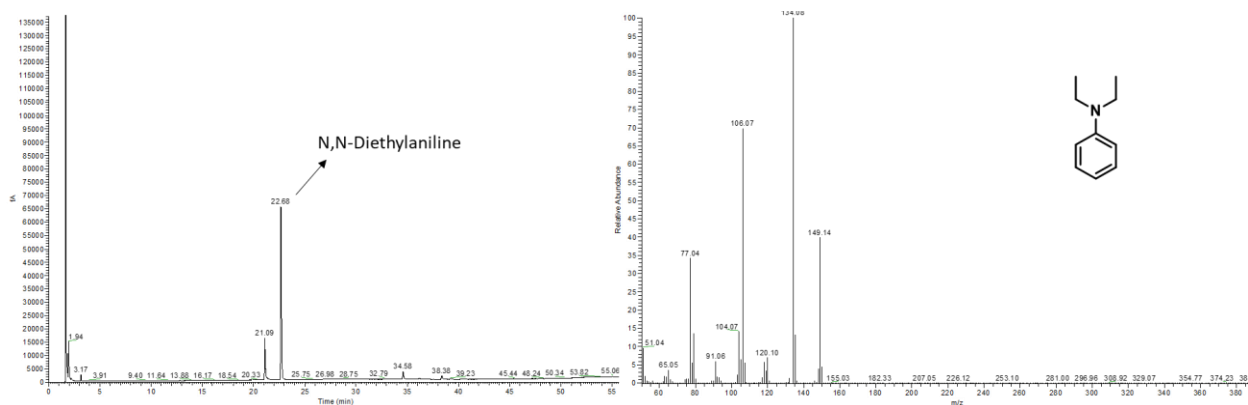

**Figure S24:** GC chromatograms of N-ethylation of aniline.

## References:

- (1) Liu, J.; Song, Y.; Wu, X.; Ma, L. *ACS Omega* **2021**, *6* (35), 22504–22513.
- (2) Ge, X.; Luo, C.; Qian, C.; Yu, Z.; Chen, X. *RSC Adv.* **2014**, *4* (81), 43195–43203.
- (3) Wang, H.; Huang, Y.; Dai, X.; Shi, F. *Chem. Comm.* **2017**, *53* (40), 5542–5545.
- (4) Liu, J.; Song, Y.; Zhuang, X.; Zhang, M.; Ma, L. *Green Chem.* **2021**, *23* (12), 4604–4617.
